# Supplementary material for: Genome-Wide Identification and Characterization of Effector Candidates with Conserved Motif in Falciphora oryzae
Source: MDPI journal article supplement (doi:10.3390/ijms25010650), 2024-01-04
Supplement: s1 [file s1]

**Table S1.** Primers mentioned in the article.

| Primer usage               | Primer name   | Primer sequence(5'-3')                          |
|----------------------------|---------------|-------------------------------------------------|
| Transient expression assay | TRV-11649-F   | AAGTGGCTTTCTAGCGGATCCATGAAGTACTCCACCGCCCTCG     |
|                            | TRV-11649-R   | AACATCGTATGGGTATCCCGGGGTACGCAGCGAAGAAAGCCAG     |
|                            | TRV-10237-F   | AAAGTGGCTTTCTAGCGGATCCATGCAGTTCAAGACCGTCCTCGTCG |
|                            | TRV-10237-R   | AACATCGTATGGGTATCCCGGGCTTGGTGCCAGGGAGGGGAGC     |
|                            | TRV-3960-F    | AAGTGGCTTTCTAGCGGATCCATGCAGTTCTCCGTTGTCGC       |
|                            | TRV-3960-R    | AACATCGTATGGGTACCCGGGGCAGACGGGGACCTTGAT         |
|                            | TRV-11871-F   | AAGTGGCTTTCTAGCGGATCCATGATTTCCAGCATGAAGGTCGC    |
|                            | TRV-11871-R   | AACATCGTATGGGTATCCCGGGGAGGAGGAAGACAGCAACGCC     |
|                            | TRV-12356-F   | AAAGTGGCTTTCTAGCGGATCCATGGCTATCATCCGCTCTTTACACC |
|                            | TRV-12356-R   | AACATCGTATGGGTATCCCGGGGGCAGAGCCTGGCTGCT         |
| qRT-PCR assay              | qrt-3960-F    | CGAGAACCCTAACTTCATCCAG                          |
|                            | qrt-3960-R    | CTTGGCGATGGTGTAGGTG                             |
|                            | qrt-11871-F   | ACATGTCGGCATTCCCC                               |
|                            | qrt-11871-R   | CAATCCCTGACACCGTAGAG                            |
|                            | qrt-10237-F   | CAGTTCAAGACCGTCCTCG                             |
|                            | qrt-10237-R   | GCAGGCAAAGTCAAAGACG                             |
|                            | qrt-11649-F   | GATTGTCTCTTCAGGAACCGG                           |
|                            | qrt-11649-R   | TGGTACCGGGCATAAAAGTG                            |
|                            | qrt-12356-F   | CGCGACAGCCACCAGCTG                              |
|                            | qrt-12356-R   | AGACCGTGGCTTGGCGGC                              |
|                            | qrt-Tubulin-F | CTGTCAACGACCCTTTCA                              |
|                            | qrt-Tubulin-R | CTGTCAACGACCCTTTCA                              |

**Table S2.** Effector candidates containing identical sequence of RXLR.

| Type                                                    | Gene accession | RXLR feature | Conserved domain (pfam) | EffectorP prediction | Effector probability | WT FPKM | 2dpi FPKM | 6dpi FPKM | 15dpi FPKM |
|---------------------------------------------------------|----------------|--------------|-------------------------|----------------------|----------------------|---------|-----------|-----------|------------|
| Secreted proteins containing identical sequence of RXLR | g10077         | RDLR         | N.A.                    | Apoplastic effector  | 0.59                 | 0.5     | 2.1       | 1.9       | 1.5        |

**Table S3.** Effector candidates containing complete RXLR-dEER-like motif.

| Type                                                               | Gene accession | RXLR-dEER feature | Conserved domain (pfam)                                       | EffectorP prediction | Effector probability | WT FPKM | 2dpi FPKM | 6dpi FPKM | 15dpi FPKM |
|--------------------------------------------------------------------|----------------|-------------------|---------------------------------------------------------------|----------------------|----------------------|---------|-----------|-----------|------------|
| Secreted proteins containing a complete sequence of RXLR-dEER-like | g938           | KGLL-HDDK         | Cyclophilin type peptidyl-prolyl cis-trans isomerase(PF00160) | Cytoplasmic effector | 0.546                | 80.9    | 443.7     | 519.7     | 348.1      |
|                                                                    | g7747          | KYYR-GDEK         | N.A.                                                          | Apoplastic effector  | 0.734                | 0.1     | 2.8       | 23.2      | 8.7        |
|                                                                    | g7112          | KSLA-AEER         | N.A.                                                          | Cytoplasmic effector | 0.669                | 3.3     | 67.0      | 31.2      | 33.8       |
|                                                                    | g6636          | KYYR-GDEK         | N2,N2-dimethylguanosine tRNA methyltransferase(PF02005)       | Apoplastic effector  | 0.583                | 24.5    | 81.8      | 279.2     | 128.5      |
|                                                                    | g5512          | KKKG-AEDK         | Fungal kinase associated-1 domain(PF16797)                    | Cytoplasmic effector | 0.828                | 2.2     | 330.6     | 295.9     | 209.6      |
|                                                                    | g3870          | KAKR-NDDK         | N.A.                                                          | Cytoplasmic effector | 0.665                | 0.9     | 28.1      | 4.5       | 11.2       |
|                                                                    | g3164          | RWMA-PDEK         | N.A.                                                          | Cytoplasmic effector | 0.803                | 0.2     | 281.0     | 351.8     | 211.0      |
|                                                                    | g2481          | KGKA-LEER         | Collagen triple helix repeat(PF01391)                         | Cytoplasmic effector | 0.839                | 0.1     | 0.3       | 1.2       | 0.5        |
|                                                                    | g2119          | RTYT-GEDK         | N.A.                                                          | Cytoplasmic effector | 0.544                | 4.3     | 9.9       | 38.6      | 17.6       |
|                                                                    | g2095          | KRLT-PEEK         | N.A.                                                          | Cytoplasmic effector | 0.674                | 1.3     | 7.2       | 5.2       | 4.6        |
|                                                                    | g1368          | RVKA-GDER         | Pectinesterase(PF01095)                                       | Apoplastic effector  | 0.583                | 4.5     | 13.4      | 43.1      | 20.3       |
|                                                                    | g13062         | KIMR-DDDR         | N.A.                                                          | Apoplastic effector  | 0.893                | 22.4    | 36.0      | 47.8      | 35.4       |
|                                                                    | g12291         | KDKA-KDDK         | E4 protein(PF02711)                                           | Cytoplasmic effector | 0.524                | 11.8    | 41.4      | 31.5      | 28.2       |
|                                                                    | g12285         | KDFA-ADDK         | N.A.                                                          | Cytoplasmic effector | 0.658                | 1.2     | 33.5      | 82.2      | 39.0       |
|                                                                    | g11908         | RDLG-DDEK         | LicD family(PF04991)                                          | Cytoplasmic effector | 0.62                 | 9.4     | 34.8      | 36.3      | 26.8       |
|                                                                    | g1156          | HVLA-KEEK         | Heat-labile enterotoxin alpha                                 | Cytoplasmic effector | 0.776                | 2.4     | 5.7       | 5.3       | 4.5        |

| chain(PF01375) |           |                                      |                      |       |       |       |       |       |
|----------------|-----------|--------------------------------------|----------------------|-------|-------|-------|-------|-------|
| g10438         | RLYL-SDDR | Glycosyl hydrolase family 7(PF00840) | Apoplastic effector  | 0.639 | 0.1   | 5.3   | 167.5 | 57.6  |
| g10339         | KNKR-EEEK | N.A.                                 | Cytoplasmic effector | 0.588 | 6.6   | 71.7  | 71.6  | 50.0  |
| g10282         | KGIL-SEDK | N.A.                                 | Apoplastic effector  | 0.598 | 0.8   | 4.9   | 9.6   | 5.1   |
| g10224         | KCYT-FEDR | N.A.                                 | Apoplastic effector  | 0.924 | 3.2   | 7.1   | 7.9   | 6.0   |
| g10077         | RDLR-SDER | N.A.                                 | Apoplastic effector  | 0.59  | 0.5   | 2.1   | 1.9   | 1.5   |
| g10066         | KWKA-DEDK | N.A.                                 | Cytoplasmic effector | 0.654 | 3.8   | 8.5   | 10.7  | 7.7   |
| g3869          | KQLA-KEDK | Mannosyltransferase(PF11051)         | Cytoplasmic effector | 0.745 | 9.7   | 48.6  | 33.2  | 19.1  |
| g3691          | KVFR-ADDK | Thioredoxin(PF00085)                 | Cytoplasmic effector | 0.68  | 169.5 | 380.5 | 508.5 | 335.6 |
| g2686          | KFFL-IEDR | N.A.                                 | Cytoplasmic effector | 0.704 | 135.4 | 535.0 | 452.5 | 152.3 |
| g1968          | RVFL-VEER | Cutinase (PF01083)                   | Apoplastic effector  | 0.667 | 7.9   | 31.1  | 40.4  | 14.8  |
| g1935          | KDWL-SEDK | Ish1 (PF10281)                       | Cytoplasmic effector | 0.563 | 4.5   | 32.9  | 18.2  | 16.3  |
| g13036         | HMKA-EEEK | Peptidase family M28(PF04389)        | Cytoplasmic effector | 0.556 | 74.4  | 230.7 | 188.0 | 120.5 |

**Table S4.** Effector candidates containing Y/F/WxC motif

| Gene accession | Y/F/WxC<br>feature | Conserved domain (pfam)                                    | EffectorP<br>prediction | Effector<br>probability | WT<br>FPKM | 2dpi<br>FPKM | 6dpi<br>FPKM | 15dpi<br>FPKM |
|----------------|--------------------|------------------------------------------------------------|-------------------------|-------------------------|------------|--------------|--------------|---------------|
| g5612          | YPC                | Family of unknown function (PF20238)                       | Apoplastic effector     | 0.592                   | 784.5      | 1745.5       | 5178.2       | 2569.4        |
| g4041          | FIC                | N.A.                                                       | Cytoplasmic effector    | 0.78                    | 6.8        | 11.2         | 13.8         | 10.6          |
| g3965          | YVC                | N.A.                                                       | Apoplastic effector     | 0.74                    | 0.3        | 162.7        | 230.2        | 131.1         |
| g3525          | WDC                | Glycosyl hydrolase family 45(PF02015)                      | Apoplastic effector     | 0.839                   | 0.9        | 9.8          | 461.7        | 157.4         |
| g3166          | YGC                | Uncharacterized protein conserved in<br>bacteria (PF09937) | Cytoplasmic effector    | 0.862                   | 0.6        | 24.7         | 30.6         | 18.6          |
| g3164          | WTC                | N.A.                                                       | Cytoplasmic effector    | 0.803                   | 0.2        | 281.0        | 351.8        | 211.0         |
| g2691          | FTC                | Glucosidase II beta<br>subunit-like(PF12999)               | Cytoplasmic effector    | 0.504                   | 28.5       | 145.4        | 115.6        | 96.5          |
| g2444          | FYC                | N.A.                                                       | Apoplastic effector     | 0.814                   | 12.5       | 28.6         | 126.1        | 55.7          |
| g14270         | YQC                | ToxB N-terminal domain(PF18224)                            | Cytoplasmic effector    | 0.581                   | 0.8        | 8.4          | 11.2         | 6.8           |
| g12983         | FKC                | N.A.                                                       | Apoplastic effector     | 0.574                   | 17.0       | 64.7         | 35.0         | 38.9          |
| g12957         | WEC                | N.A.                                                       | Apoplastic effector     | 0.789                   | 1.1        | 26.8         | 5.4          | 11.1          |
| g12852         | FVC                | Alternaria alternata allergen 1(PF16541)                   | Apoplastic effector     | 0.658                   | 1.7        | 256.9        | 311.0        | 189.9         |
| g12181         | YTC                | Cellulase (glycosyl hydrolase family 5)<br>(PF00150)       | Apoplastic effector     | 0.509                   | 10.8       | 74.7         | 211.3        | 98.9          |
| g121           | WDC                | Glycosyl hydrolase family 45(PF02015)                      | Apoplastic effector     | 0.896                   | 3.3        | 8.5          | 32.2         | 14.7          |
| g11545         | YDC                | N.A.                                                       | Apoplastic effector     | 0.831                   | 1.3        | 5.1          | 5.8          | 4.1           |
| g10237         | FAC                | CFEM domain (PF05730)                                      | Apoplastic effector     | 0.829                   | 12.1       | 1128.3       | 2355.9       | 1165.4        |
| g10077         | YGC                | Domain of unknown function (PF16129)                       | Apoplastic effector     | 0.59                    | 0.5        | 2.1          | 1.9          | 1.5           |
| g11297         | YGC                | N.A.                                                       | Cytoplasmic effector    | 0.804                   | 1.5        | 16.9         | 282.6        | 106.1         |

## Lysm

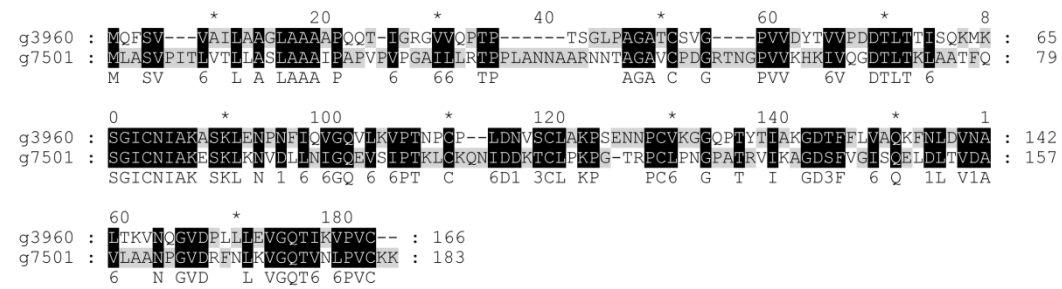

## Cutinase

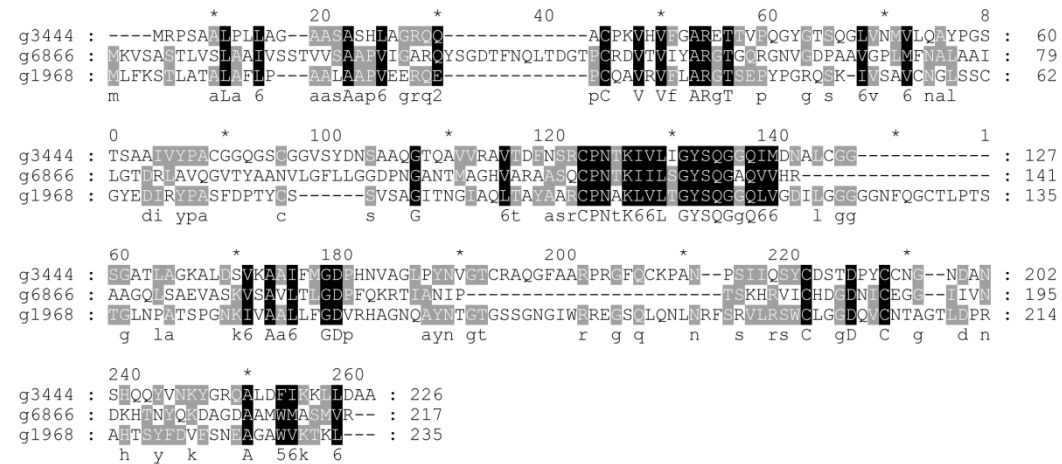

## DPBB\_1

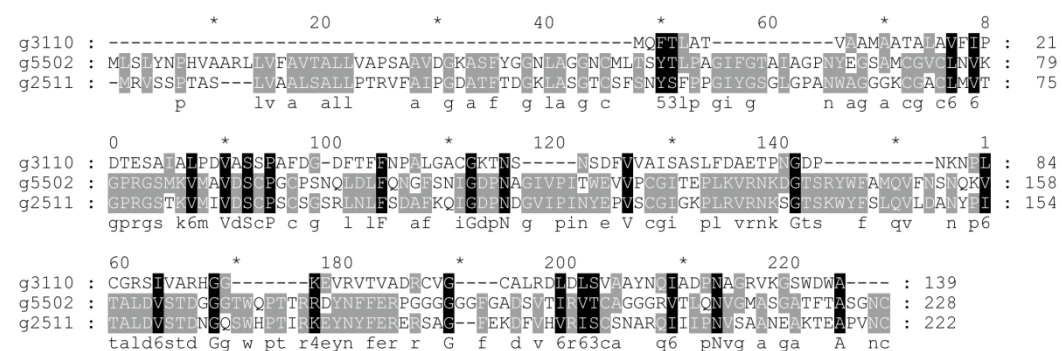

**Figure S1.** Multiple sequence alignment of *Foryzae* effector candidates containing Lysm, DPBB\_1 and Cutinas domains. The full sequences of the proteins were aligned by Clustal X. The intensity of black shadow reflects the identity of amino acids at each position.
